# Supplementary material for: Genome-Wide Association Study on Reproductive Traits Using Imputation-Based Whole-Genome Sequence Data in Yorkshire Pigs
Source: MDPI journal article supplement (doi:10.3390/genes14040861), 2023-04-02
Supplement: s1 [file s1]

**Supplementary Table S1.** The genomic inflation factor ( $\lambda$ ) for each GWAS using chip and imputation data in pigs.

| Traits            | TNB   | NBA   | LBW   | GL    | NW    |
|-------------------|-------|-------|-------|-------|-------|
| $\lambda$ (chip)  | 1.276 | 1.219 | 1.022 | 1.079 | 0.978 |
| $\lambda$ (PHARP) | 0.964 | 1.095 | 1.012 | 1.030 | 0.976 |
| $\lambda$ (SWIM)  | 0.889 | 1.132 | 1.019 | 1.002 | 0.957 |
